# Supplementary material for: A first-principles study on the magnetic properties of Sc, V, Cr and Mn-doped monolayer TiS3
Source: Royal Society of Chemistry journal article supplement (doi:10.1039/c6ra06486h), 2016-01-01
Supplement: c6ra06486h5.pdf [file c6ra06486h5.pdf]

## Electronic Supplementary Information

### A first-principles study on the magnetic properties of Sc, V, Cr and Mn-doped monolayer $\text{TiS}_3$

Huiling Zheng, Mingfeng Zhu, Jianmin Zhang, Xiaobo Du and Yu Yan\*

Key Laboratory of Physics and Technology for Advanced Batteries (Ministry of Education),

Department of Physics, Jilin University, Changchun 130012, China

E-mail: [yanyu@jlu.edu.cn](mailto:yanyu@jlu.edu.cn)

#### ***MD movies of $\text{Ti}_{29}\text{XS}_{60}$ ( $X = \text{Sc, V, Cr, and Mn}$ ) at 300K.***

- Sc-doped-300K.wmv represents the  $\text{Ti}_{29}\text{ScS}_{60}$  at T=300K.
- V-doped-300K.wmv represents the  $\text{Ti}_{29}\text{VS}_{60}$  at T=300K.
- Cr-doped-300K.wmv represents the  $\text{Ti}_{29}\text{CrS}_{60}$  at T=300K.
- Mn-doped-300K.wmv represents the  $\text{Ti}_{29}\text{MnS}_{60}$  at T=300K.

---

\* Corresponding author. E-mail address: [yanyu@jlu.edu.cn](mailto:yanyu@jlu.edu.cn) (Yu Yan).
